# Supplementary material for: Assembly of chiral 3d–4f wheel-like cluster complexes with achiral ligands: single-molecule magnetic behavior and magnetocaloric effect
Source: Royal Society of Chemistry journal article supplement (doi:10.1039/d0qi00632g), 2020-01-01
Supplement: d0qi00632g1.pdf [file d0qi00632g1.pdf]

## Supporting Information

### **Assembly of chiral 3d-4f wheel-like cluster complexes with achiral ligands: single-molecule magnet behaviour and magnetocaloric effect**

Cai-Ming Liu,<sup>\*,†</sup> De-Qing Zhang,<sup>†</sup> Xiang Hao,<sup>†</sup> and Dao-Ben Zhu<sup>†</sup>

<sup>†</sup>*Beijing National Laboratory for Molecular Sciences, Center for Molecular Science, Key Laboratory of Organic Solids, Institute of Chemistry, CAS Research/Education Center for Excellence in Molecular Science, Chinese Academy of Sciences, Beijing 100190, China. E-mail: cmliu@iccas.ac.cn*

## Table of Contents

|                                                                                                                                                                                                                               |            |
|-------------------------------------------------------------------------------------------------------------------------------------------------------------------------------------------------------------------------------|------------|
| <b>Fig. S1.</b> Raman spectrum of complex <b>4</b> .                                                                                                                                                                          | <b>S3</b>  |
| <b>Fig. S2.</b> Raman spectrum of complex <b>5</b> .                                                                                                                                                                          | <b>S3</b>  |
| <b>Table S1.</b> Continuous Shape Measures calculation for Dy1 atom in <b>1-S</b> .                                                                                                                                           | <b>S4</b>  |
| <b>Fig. S3.</b> Short contacts between the perchlorate anion and the $[\text{Zn}_3\text{Dy}_3(\text{O}_2)\text{L}_3(\text{PyCO}_2)_3]$ cation in <b>1-S</b> .                                                                 | <b>S4</b>  |
| <b>Fig. S4.</b> Crystal structure of <b>1-R</b> , H atoms, hydroxide anions and lattice hydrate molecules are not shown for clarity.                                                                                          | <b>S5</b>  |
| <b>Fig. S5.</b> Crystal structure of <b>2-R</b> , H atoms, hydroxide anions and lattice hydrate molecules are not shown for clarity.                                                                                          | <b>S5</b>  |
| <b>Fig. S6.</b> Crystal structure of <b>3-R</b> , H atoms, hydroxide anions and lattice hydrate molecules are not shown for clarity.                                                                                          | <b>S6</b>  |
| <b>Table S2.</b> Continuous Shape Measures calculation for Dy1 atom in <b>4-S</b> .                                                                                                                                           | <b>S6</b>  |
| <b>Fig. S7.</b> Crystal structure of <b>5-S</b> , H atoms, hydroxide anions and lattice hydrate molecules are not shown for clarity.                                                                                          | <b>S7</b>  |
| <b>Fig. S8.</b> Plot of $1/\chi$ versus $T$ for <b>3</b> ( $H_{\text{dc}} = 1000$ Oe).                                                                                                                                        | <b>S7</b>  |
| <b>Fig. S9.</b> AC susceptibilities measured at 2.5 Oe ac magnetic field with variable dc fields at 997 Hz and 10.5 K for <b>1</b> .                                                                                          | <b>S8</b>  |
| <b>Fig. S10.</b> Plot of $\ln(\tau)$ versus $1/T$ for <b>1</b> ( $H_{\text{dc}} = 1000$ Oe). The solid lines represent the best fitting with the Arrhenius law (blue) and Orbach plus Raman (cyan).                           | <b>S8</b>  |
| <b>Fig. S11.</b> Cole-Cole plots at 4-10 K for <b>1</b> ( $H_{\text{dc}} = 1000$ Oe and $H_{\text{ac}} = 2.5$ Oe), the solid lines represent the best fitting.                                                                | <b>S9</b>  |
| <b>Fig. S12.</b> AC susceptibilities for <b>2</b> ( $H_{\text{dc}} = 0$ Oe and $H_{\text{ac}} = 2.5$ Oe).                                                                                                                     | <b>S9</b>  |
| <b>Fig. S13.</b> AC susceptibilities measured at 2.5 Oe ac magnetic field with variable dc fields at 997 Hz and 3 K for <b>2</b> .                                                                                            | <b>S10</b> |
| <b>Fig. S14.</b> Plot of $\ln(\tau)$ versus $1/T$ for <b>2</b> ( $H_{\text{dc}} = 1400$ Oe), the solid line represents the best fitting with the Arrhenius law.                                                               | <b>S10</b> |
| <b>Table S3.</b> Linear combination of two modified Debye model fitting parameters from 1.9 K to 3.1 K of <b>2</b> under 1400 Oe dc field.                                                                                    | <b>S11</b> |
| <b>Fig. S15.</b> Plots of $\chi''$ versus $T$ for <b>4</b> ( $H_{\text{dc}} = 0$ Oe, $H_{\text{ac}} = 0$ Oe).                                                                                                                 | <b>S11</b> |
| <b>Fig. S16.</b> AC susceptibilities measured at 2.5 Oe ac magnetic field with variable dc fields at 997 Hz and 7 K for <b>4</b> .                                                                                            | <b>S12</b> |
| <b>Fig. S17.</b> Plot of $\ln(\tau)$ versus $1/T$ for <b>4</b> ( $H_{\text{dc}} = 1400$ Oe). The solid lines represent the best fitting with the Arrhenius law (blue) and Orbach plus Raman (cyan).                           | <b>S12</b> |
| <b>Fig. S18.</b> Plot of $\ln(\tau)$ versus $1/T$ for <b>5</b> ( $H_{\text{dc}} = 0$ Oe). The solid lines represent the best fitting with the Arrhenius law (blue) and Orbach plus Raman and quantum tunneling effect (cyan). | <b>S13</b> |
| <b>Fig. S19.</b> Hysteresis loop for <b>5</b> at 1.9 K.                                                                                                                                                                       | <b>S13</b> |

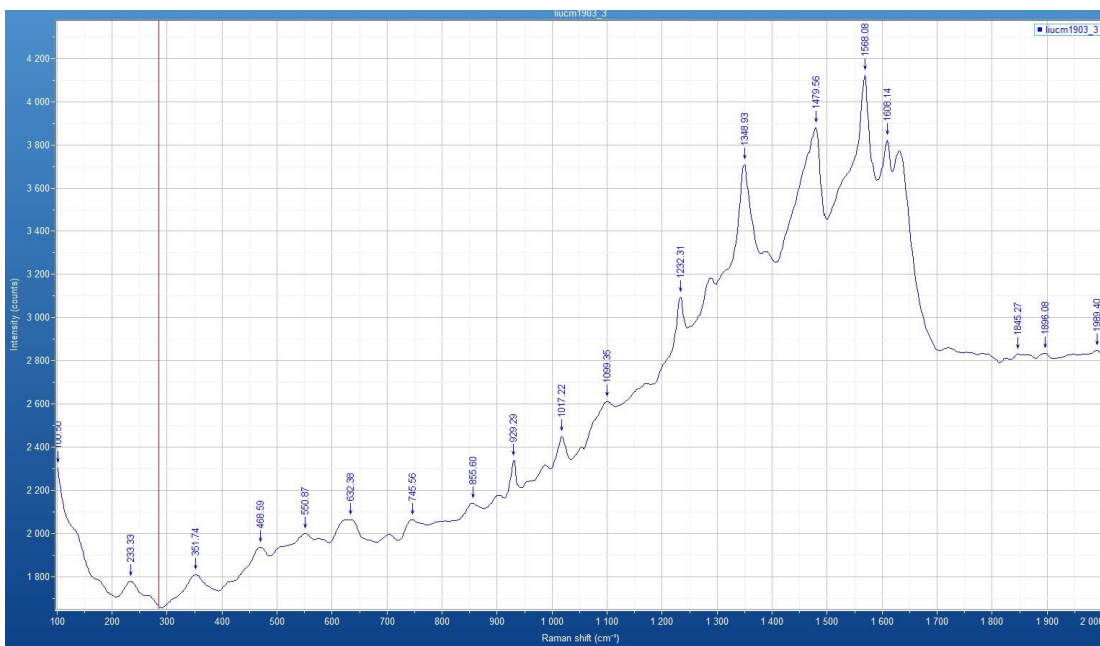

**Fig. S1.** Raman spectrum of complex 4.

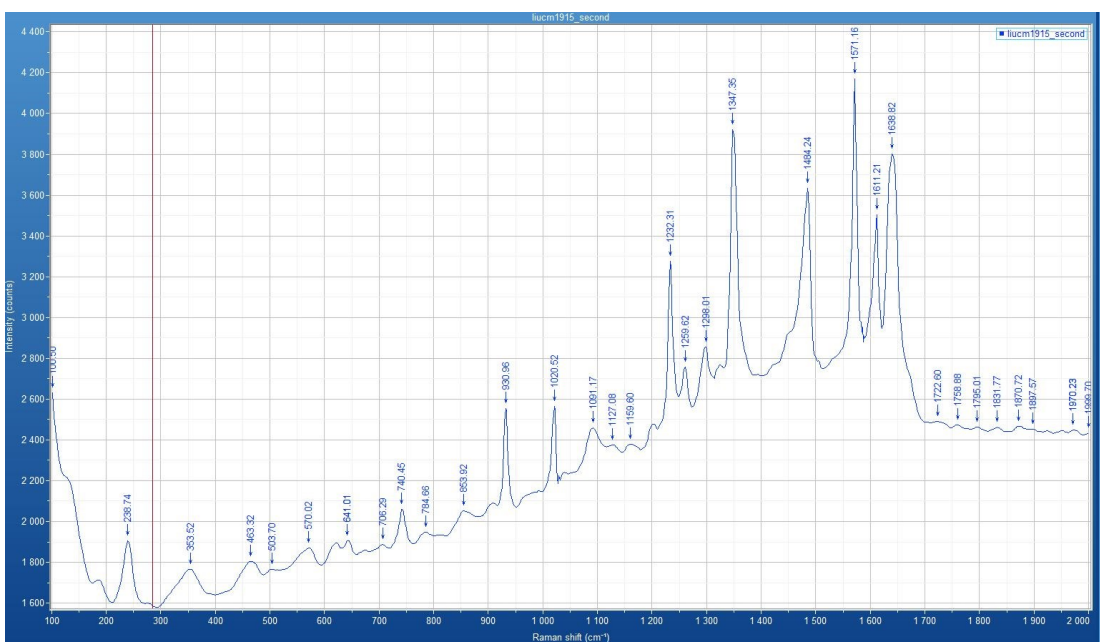

**Fig. S2.** Raman spectrum of complex 5.

**Table S1.** Continuous Shape Measures calculation for Dy1 atom in **1-S**.

Dy1 structures

|          |        |                                    |
|----------|--------|------------------------------------|
| EP-9     | 1 D9h  | Enneagon                           |
| OPY-9    | 2 C8v  | Octagonal pyramid                  |
| HBPY-9   | 3 D7h  | Heptagonal bipyramid               |
| JTC-9    | 4 C3v  | Johnson triangular cupola J3       |
| JCCU-9   | 5 C4v  | Capped cube J8                     |
| CCU-9    | 6 C4v  | Spherical-relaxed capped cube      |
| JCSAPR-9 | 7 C4v  | Capped square antiprism J10        |
| CSAPR-9  | 8 C4v  | Spherical capped square antiprism  |
| JTCTPR-9 | 9 D3h  | Tricapped trigonal prism J51       |
| TCTPR-9  | 10 D3h | Spherical tricapped trigonal prism |
| JTDIC-9  | 11 C3v | Tridiminished icosahedron J63      |
| HH-9     | 12 C2v | Hula-hoop                          |
| MFF-9    | 13 Cs  | Muffin                             |

| Structure [ML9] | EP-9   | OPY-9  | HBPY-9 | JTC-9  | JCCU-9 | CCU-9 | JCSAPR-9 | CSAPR-9 | JTCTPR-9 | TCTPR-9 | JTDIC-9 | HH-9  | MFF-9        |
|-----------------|--------|--------|--------|--------|--------|-------|----------|---------|----------|---------|---------|-------|--------------|
| ABOXIV          | 33.661 | 22.181 | 17.376 | 16.003 | 10.464 | 8.748 | 5.007    | 4.357   | 6.627    | 5.073   | 13.344  | 7.153 | <b>3.475</b> |

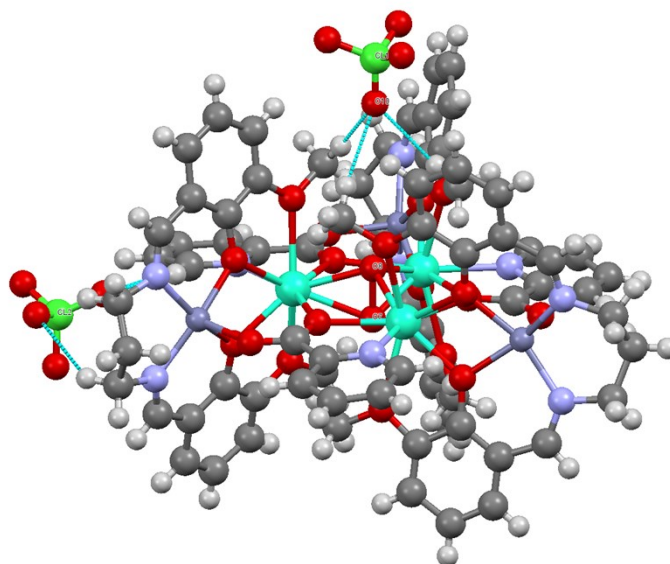

**Fig. S3.** Short contacts between the perchlorate anion and the  $[Zn_3Dy_3(O_2)L_3(PyCO_2)_3]$  cation in **1-S**.

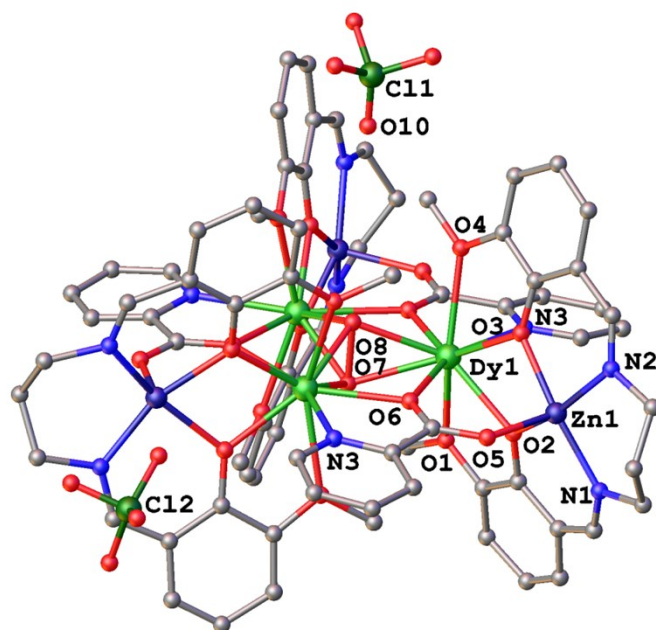

**Fig. S4.** Crystal structure of **1-R**, H atoms, hydroxide anions and lattice hydrate molecules are not shown for clarity.

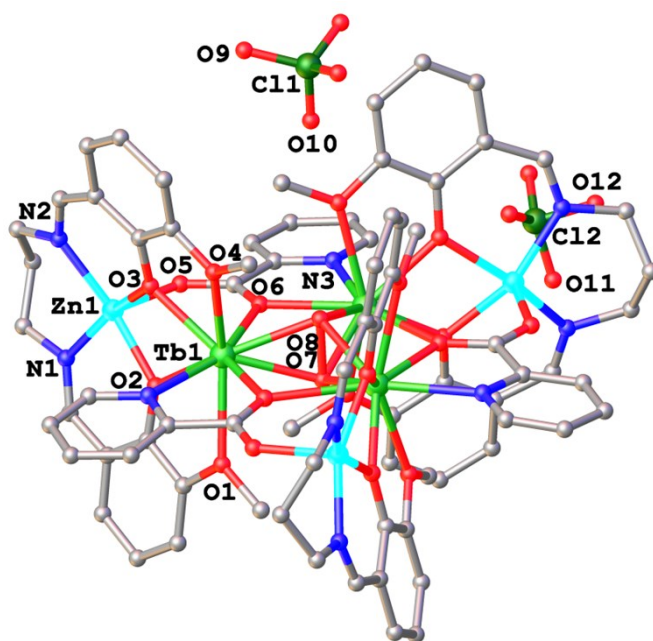

**Fig. S5.** Crystal structure of **2-R**, H atoms, hydroxide anions and lattice hydrate molecules are not shown for clarity.

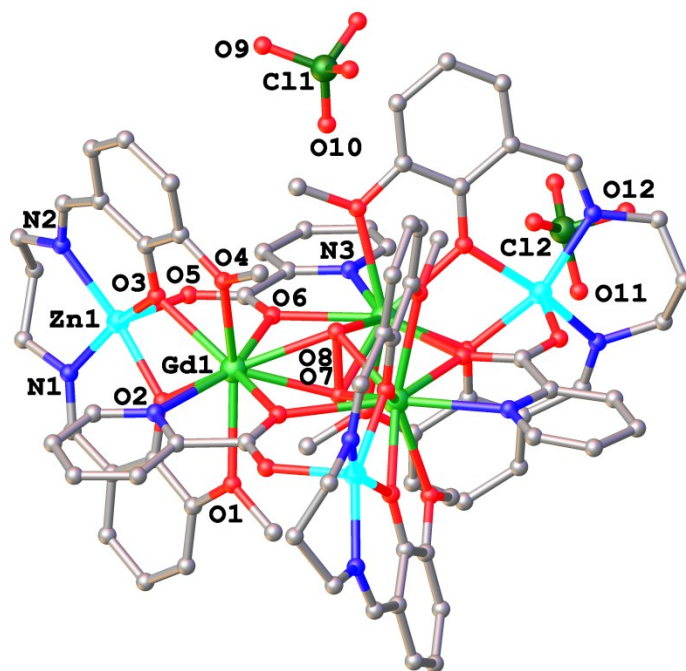

**Fig. S6.** Crystal structure of **3-R**, H atoms, hydroxide anions and lattice hydrate molecules are not shown for clarity.

**Table S2.** Continuous Shape Measures calculation for Dy1 atom in **4-S**.

Dy1 structures

|          |        |                                    |
|----------|--------|------------------------------------|
| EP-9     | 1 D9h  | Enneagon                           |
| OPY-9    | 2 C8v  | Octagonal pyramid                  |
| HBPY-9   | 3 D7h  | Heptagonal bipyramid               |
| JTC-9    | 4 C3v  | Johnson triangular cupola J3       |
| JCCU-9   | 5 C4v  | Capped cube J8                     |
| CCU-9    | 6 C4v  | Spherical-relaxed capped cube      |
| JCSAPR-9 | 7 C4v  | Capped square antiprism J10        |
| CSAPR-9  | 8 C4v  | Spherical capped square antiprism  |
| JTCTPR-9 | 9 D3h  | Tricapped trigonal prism J51       |
| TCTPR-9  | 10 D3h | Spherical tricapped trigonal prism |
| JTDIC-9  | 11 C3v | Tridiminished icosahedron J63      |
| HH-9     | 12 C2v | Hula-hoop                          |
| MFF-9    | 13 Cs  | Muffin                             |

| Structure [ML9] | EP-9   | OPY-9  | HBPY-9 | JTC-9  | JCCU-9 | CCU-9 | JCSAPR-9 | CSAPR-9 | JTCTPR-9 | TCTPR-9 | JTDIC-9 | HH-9  | MFF-9        |
|-----------------|--------|--------|--------|--------|--------|-------|----------|---------|----------|---------|---------|-------|--------------|
| ABOXIY          | 33.232 | 22.068 | 17.306 | 15.642 | 10.001 | 8.784 | 4.976    | 4.295   | 6.460    | 5.015   | 13.071  | 6.894 | <b>3.400</b> |

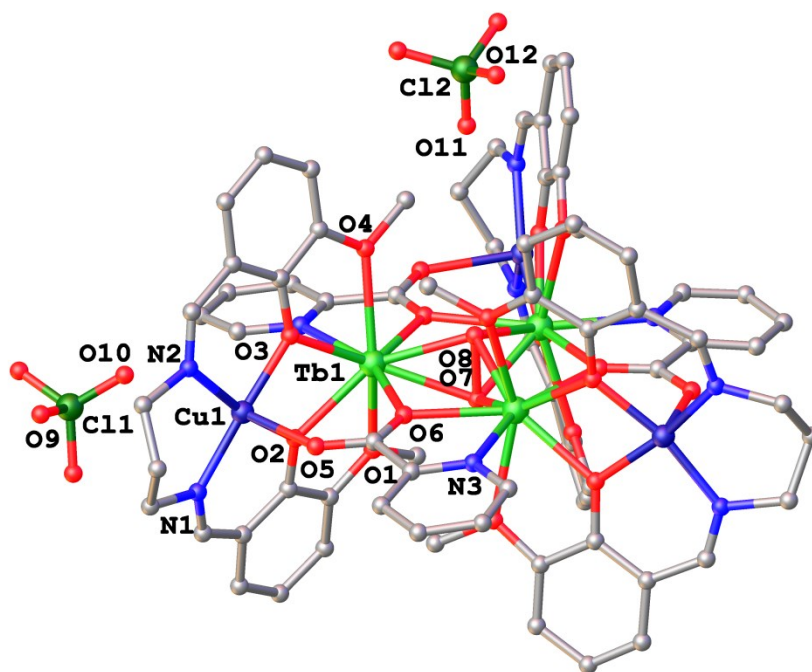

**Fig. S7.** Crystal structure of **5-S**, H atoms, hydroxide anions and lattice hydrate molecules are not shown for clarity.

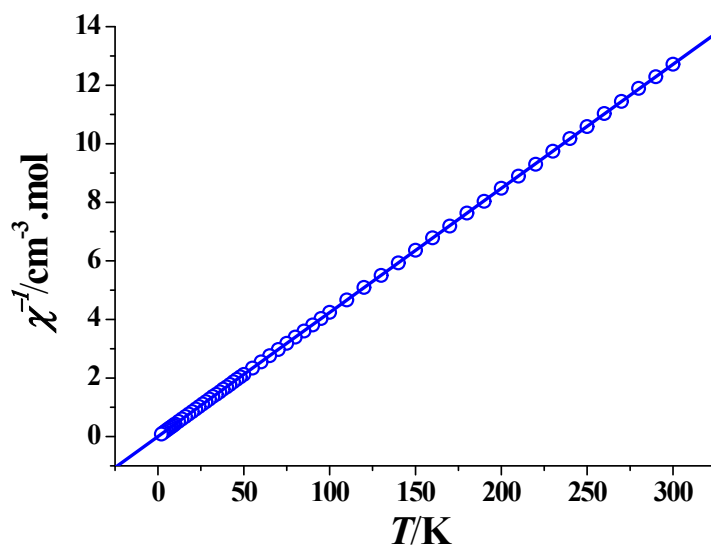

**Fig. S8.** Plot of  $1/\chi$  versus  $T$  for **3** ( $H_{\text{dc}} = 1000$  Oe).

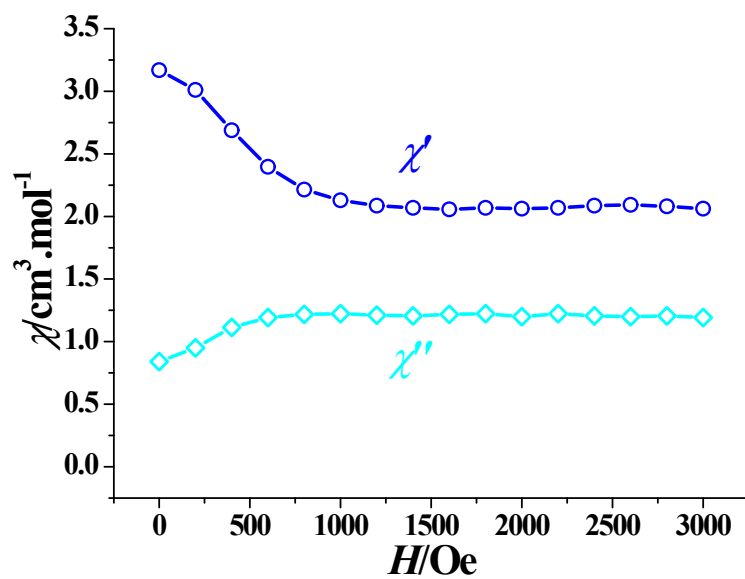

**Fig. S9.** AC susceptibilities measured at 2.5 Oe ac magnetic field with variable dc fields at 997 Hz and 10.5 K for **1**.

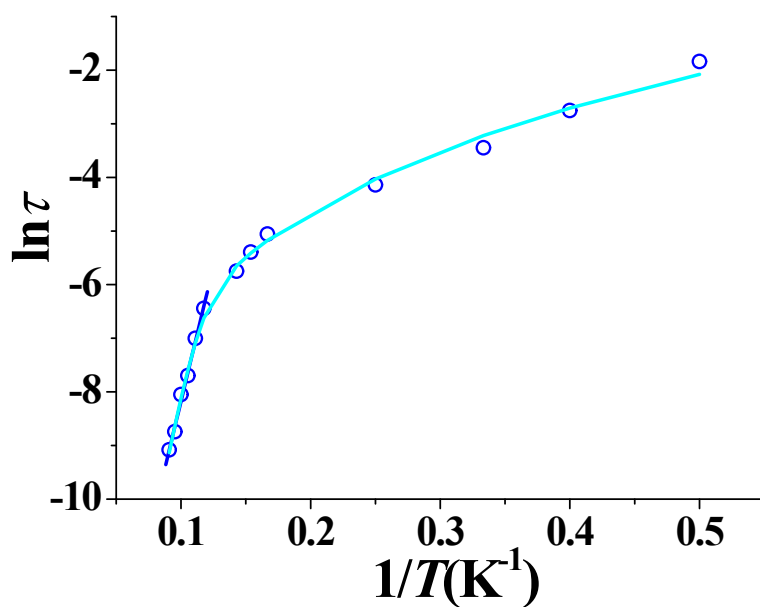

**Fig. S10.** Plot of  $\ln(\tau)$  versus  $1/T$  for **1** ( $H_{dc} = 1000$  Oe). The solid lines represent the best fitting with the Arrhenius law (blue) and Orbach *plus* Raman (cyan).



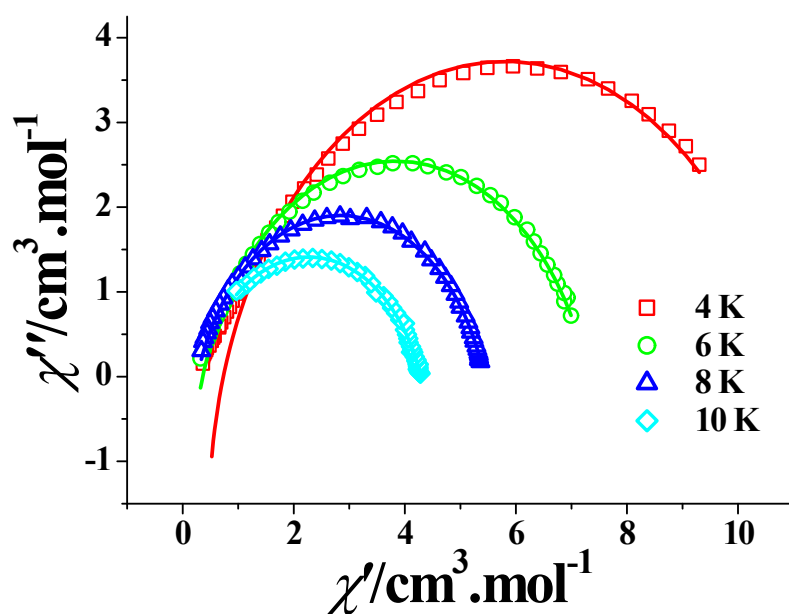

**Fig. S11.** Cole-Cole plots at 4-10 K for **1** ( $H_{dc} = 1000$  Oe and  $H_{ac} = 2.5$  Oe), the solid lines represent the best fitting.

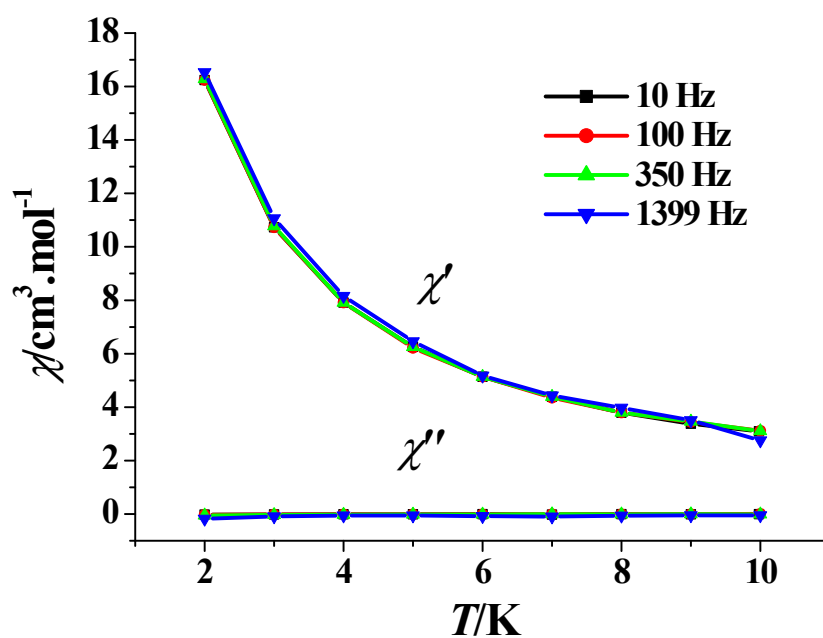

**Fig. S12.** AC susceptibilities for **2** ( $H_{dc} = 0$  Oe and  $H_{ac} = 2.5$  Oe).

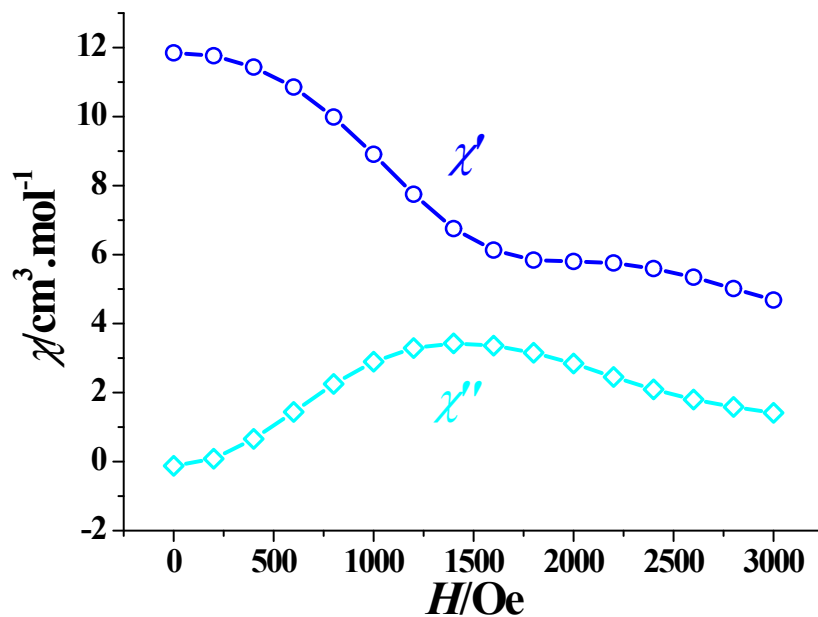

**Fig. S13.** AC susceptibilities measured at 2.5 Oe ac magnetic field with variable dc fields at 997 Hz and 3 K for **2**.

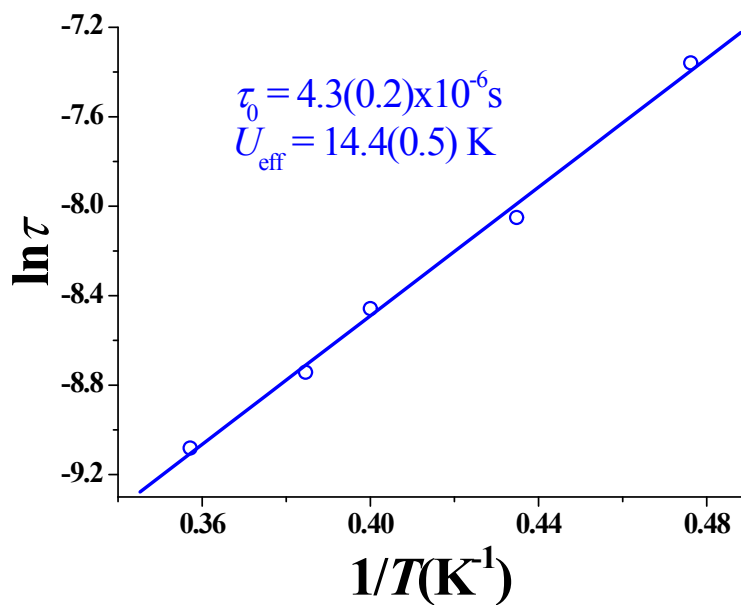

**Fig. S14.** Plot of  $\ln(\tau)$  versus  $1/T$  for **2** ( $H_{dc} = 1400$  Oe), the solid line represents the best fitting with the Arrhenius law.

**Table S3.** Linear combination of two modified Debye model fitting parameters from

1.9 K to 3.1 K of **2** under 1400 Oe dc field.

| $T(K)$ | $\chi_2(\text{cm}^3.\text{mol}^{-1})$ | $\chi_1(\text{cm}^3.\text{mol}^{-1})$ | $\chi_0(\text{cm}^3.\text{mol}^{-1})$ | $\tau_1(\text{s})$ | $\alpha_1$ | $\tau_2(\text{s})$ | $\alpha_2$ |
|--------|---------------------------------------|---------------------------------------|---------------------------------------|--------------------|------------|--------------------|------------|
| 1.9    | 14.8869                               | 7.65154                               | 2.84358                               | 0.08422            | 0.09757    | 0.00021            | 0.09033    |
| 2.2    | 13.5975                               | 6.18693                               | 2.58835                               | 0.0821             | 0.17129    | 0.0002             | 0.06666    |
| 2.5    | 12.4808                               | 5.04745                               | 2.36233                               | 0.0963             | 0.24692    | 0.00017            | 0.05196    |
| 2.8    | 11.4484                               | 4.10277                               | 2.16193                               | 0.1044             | 0.28194    | 0.00015            | 0.04551    |
| 3.1    | 10.4721                               | 3.36066                               | 1.98698                               | 0.10874            | 0.37049    | 0.00013            | 0.03844    |

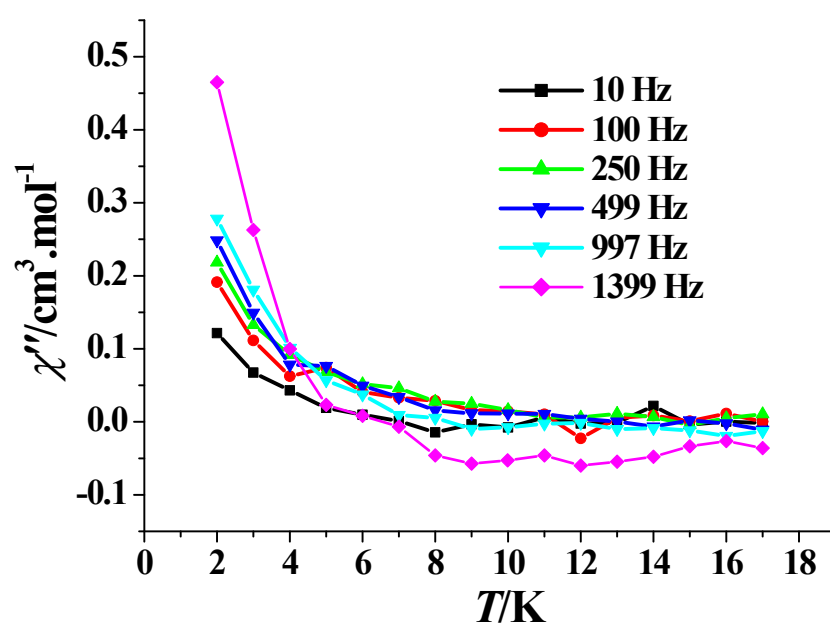

**Fig. S15.** Plots of  $\chi''$  versus  $T$  for **4** ( $H_{\text{dc}} = 0$  Oe,  $H_{\text{dc}} = 0$  Oe).

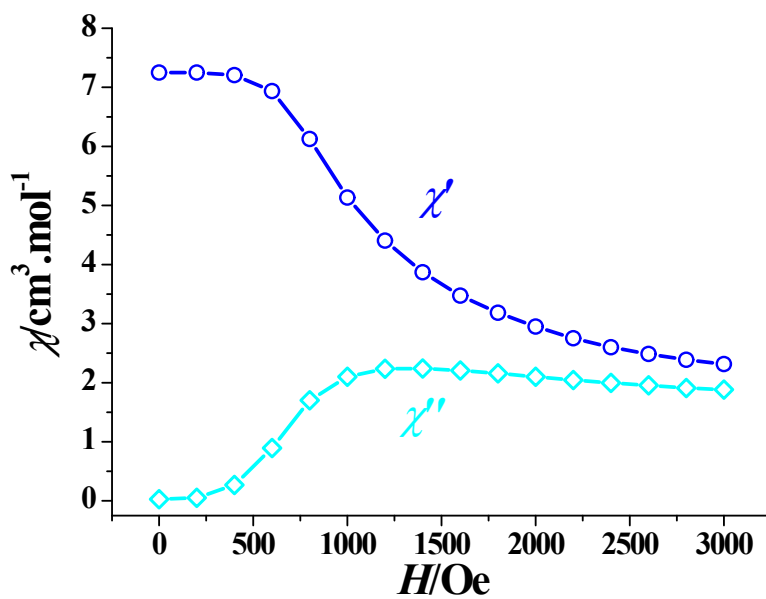

**Fig. S16.** AC susceptibilities measured at 2.5 Oe ac magnetic field with variable dc fields at 997 Hz and 7 K for **4**.

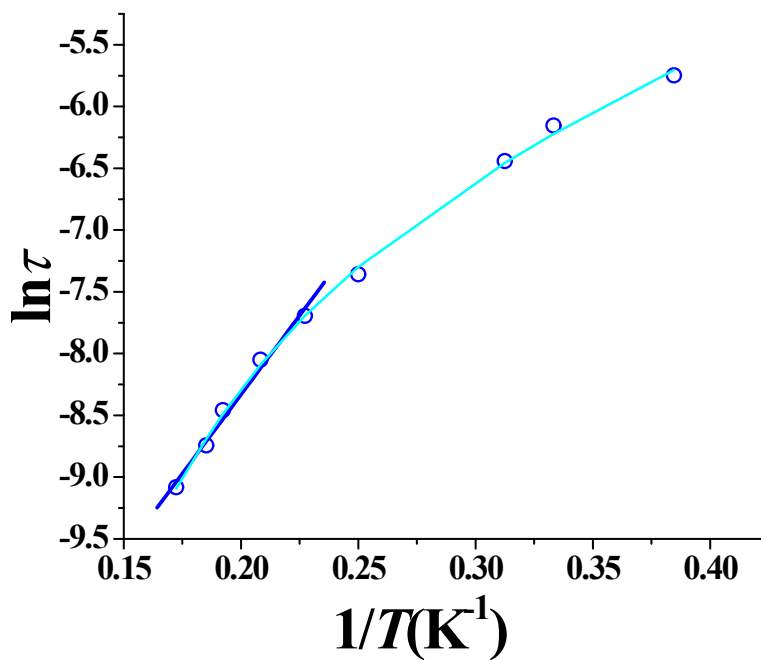

**Fig. S17.** Plot of  $\ln(\tau)$  versus  $1/T$  for **4** ( $H_{dc} = 1400$  Oe). The solid lines represent the best fitting with the Arrhenius law (blue) and Orbach plus Raman (cyan).

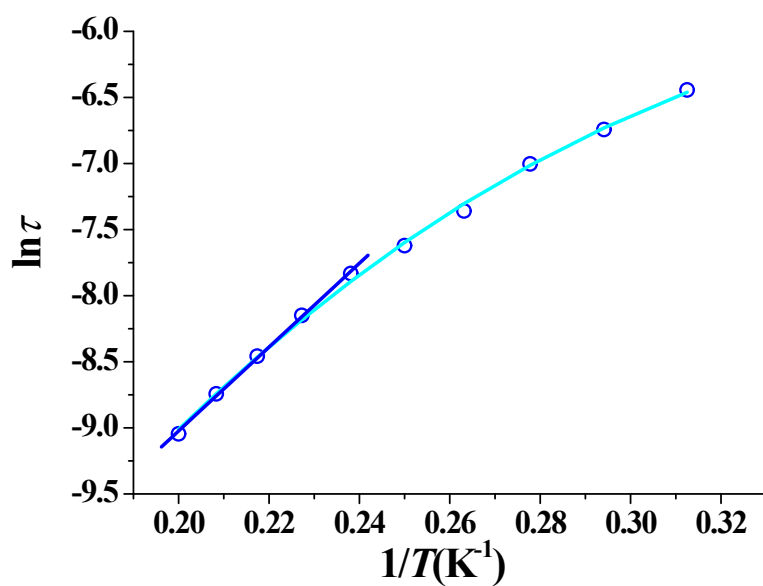

**Fig. S18.** Plot of  $\ln(\tau)$  versus  $1/T$  for **5** ( $H_{\text{dc}} = 0$  Oe). The solid lines represent the best fitting with the Arrhenius law (blue) and Orbach plus Raman and quantum tunneling effect (cyan).

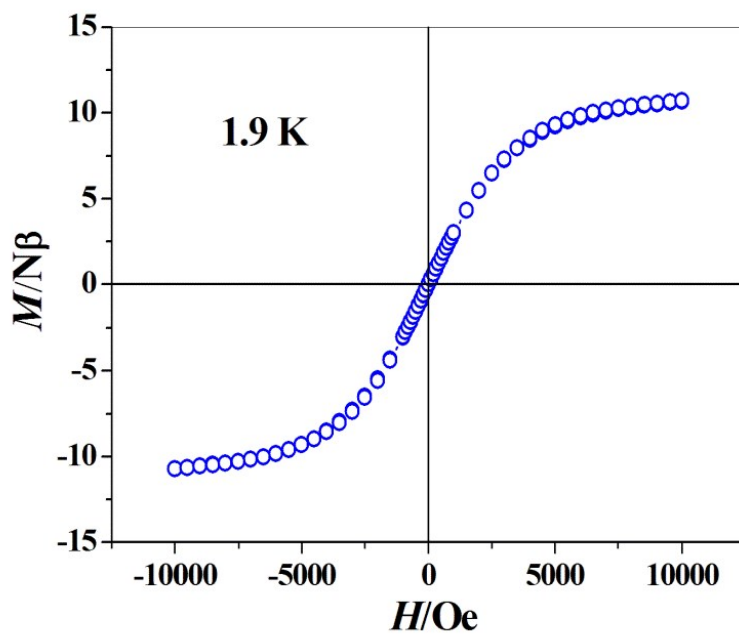

**Fig. S19.** Hysteresis loop for **5** at 1.9 K.
